# Supplementary material for: Ferrocene-functionalized polydopamine as a novel redox matrix for H2O2 oxidation
Source: Royal Society of Chemistry journal article supplement (doi:10.1039/c4tb00823e), 2014-01-01
Supplement: c4tb00823e1.pdf [file c4tb00823e1.pdf]

### AFM Morphology:

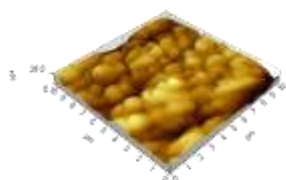

**2hours**

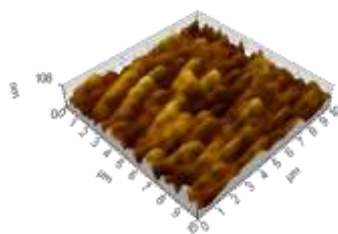

**8hours**

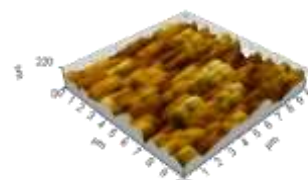

**12hours**

**Figure S1. AFM morphology of poly(DA-Fc) at different time interval**

| <b>Duration (Hrs)</b> | <b>Thickness (nm)</b> |
|-----------------------|-----------------------|
| 2                     | 15                    |
| 8                     | 25.5                  |
| 12                    | 27.2                  |
